# Supplementary material for: Highly dispersed Ag nanoparticles embedded in alumina nanobelts as excellent surface-enhanced Raman scattering substrates
Source: Royal Society of Chemistry journal article supplement (doi:10.1039/c5ra25302k), 2016-01-01
Supplement: c5ra25302k1.pdf [file c5ra25302k1.pdf]

## Electronic Supplementary Information (ESI)

### Highly dispersed Ag nanoparticles embedded in alumina nanobelts as excellent surface-enhanced Raman scattering substrates

Zhifeng Dou,<sup>\*a</sup> Chao Cui,<sup>a</sup> Yuhong Feng,<sup>a</sup> Yong Chen<sup>a</sup> and Guizhen Wang<sup>\*,b</sup>

*a. State Key Lab of Marine Resource Utilization in South China Sea and Center of Analysis and Testing (CAT), College of Materials and Chemical Engineering, Hainan University, Haikou, 570228, P. R. China.*

*b. Key Laboratory of Tropical Biological Resources of Ministry of Education, Hainan University, College of Materials and Chemical Engineering, Hainan University, Haikou, 570228, P. R. China.*

\* E-mail: [douzf@hainu.edu.cn](mailto:douzf@hainu.edu.cn); Fax & Tel: 86-0898-66168037;

E-mail: [wanguizhen0@hotmail.com](mailto:wanguizhen0@hotmail.com) Fax & Tel: 86-0898-66168172;

#### Experimental Section

**Materials Synthesis.** The one-dimensional Ag/Al<sub>2</sub>O<sub>3</sub> nanocomposites as surface-enhanced Raman scattering substrates were fabricated by a multistep method. All the reagents used were AR grade and were not purified further. DI water was used throughout the experiment. Firstly, 5 mL silver nitrate aqueous solution (45 mM) was poured slowly into 50 mL melamine aqueous solution (15 mM) under magnetic stirring to obtain milky intermediate products at room temperature. The clean glass substrates were drop-coated with the as-prepared intermediate products to form

uniform thin liquid membranes. The above glass substrates, after drying in 45 °C oven, were put into deposition chamber of atomic layer deposition (ALD) to deposit aluminum oxide layers on the surface of intermediate products. The final products were produced by heating as-prepared ALD products in nitrogen atmosphere at 400 °C for 2 h with a ramping rate of 2 °C/min. The control experiment without undergoing ALD pretreatment was conducted under the same conditions except skipping above ALD step.

**ALD Procedure.** The ALD process was carried out in a hot-wall flow-type ALD reactor. The trimethylaluminum (TMA,  $\text{Al}(\text{CH}_3)_3$ ) and deionized water as precursors were alternatively pumped into the reaction chamber (maintained at 160 °C) using high purity  $\text{N}_2$ . Each substrate was deposited 10 cycles. Typically, one complete reaction cycle took ~40 s, and consisted of four steps: (1) TMA reactant exposure time, 30 ms; (2)  $\text{N}_2$  gas purging time, 20 s; (3) water vapor exposure time, 70 ms; and (4)  $\text{N}_2$  gas purging time, 20 s.

**SERS Measurements.** SERS experiments were performed on Renishaw Invia Reflex Laser Raman spectrometer with 514 nm laser excitation based on R6G as a probe molecule. SERS spectra were acquired with a  $\times 50$  objective (NA = 0.75), exposure time 10 s and one cumulation. Laser power was set between 0.01 and 0.1 mW to maximize signal while reducing influence of dye photobleaching. A series of R6G standard solutions with different concentrations from  $1.0 \times 10^{-1}$  M to  $1.0 \times 10^{-9}$  M were prepared with stepwise dilution method. SERS mapping were conducted under the conditions of  $\times 50$  objective (NA = 0.75), exposure time 1 s and laser power 0.05 mW. The  $611 \text{ cm}^{-1}$  Raman peak was selected basing on signal intensities to baseline analytical method.

**Materials Characterization.** The morphologies and microstructures of the products were examined by a field-emission scanning electron microscope (FESEM; HITACHI, S4800, operated at 10 kV) and a high-resolution transmission electron microscope (HRTEM; JEOL, JEM-2100, 200 kV). Thermogravimetry analysis (TGA) was carried out on samples placed in corundum crucibles with a heating rate of 5

K/min (TA, Q600 apparatus, USA).

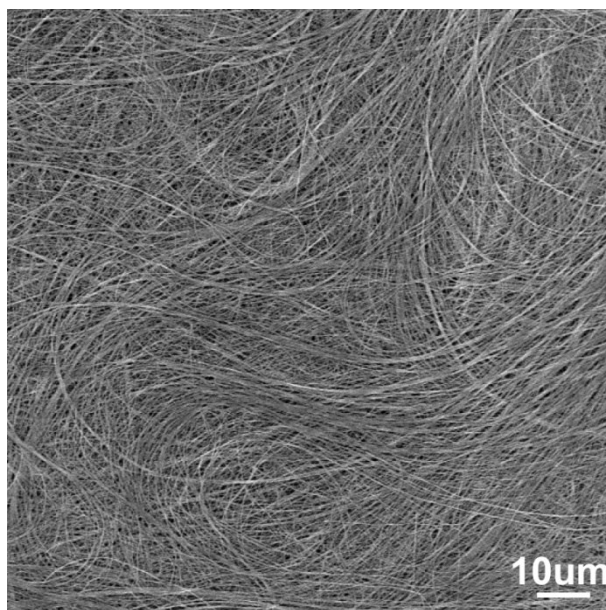

**Fig. S1** Low-magnified SEM image of AgMA CPs

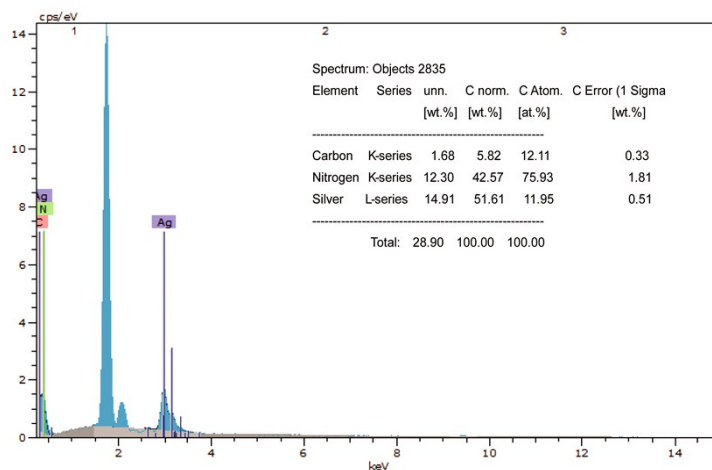

**Fig. S2** EDX pattern of AgMA CPs

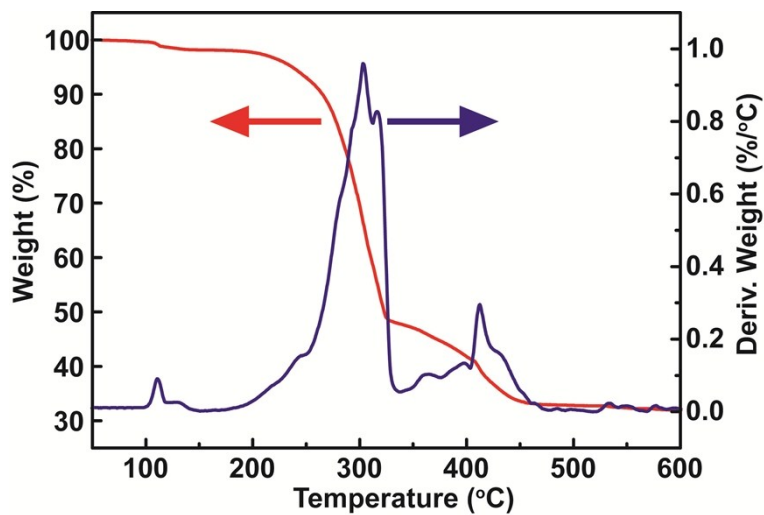

**Fig. S3** TG and DTG curves of the as-prepared AgMA CPs calcined in nitrogen atmosphere.

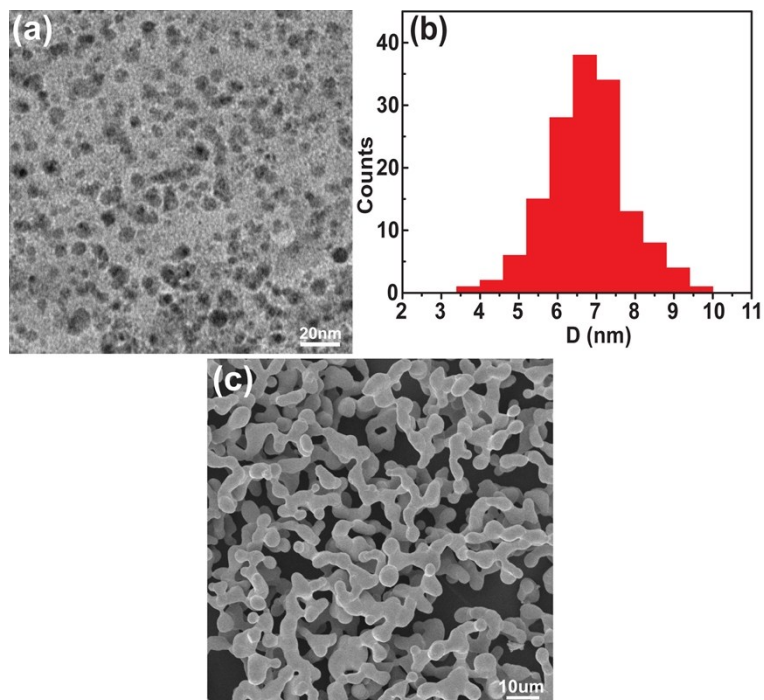

**Fig. S4** (a) TEM image and (b) the Ag nanoparticles size ( $D$ ) distribution statistic analysis graph of the as-prepared Ag/Al<sub>2</sub>O<sub>3</sub> nanobelts; (c) SEM image of the products without ALD pretreatment.

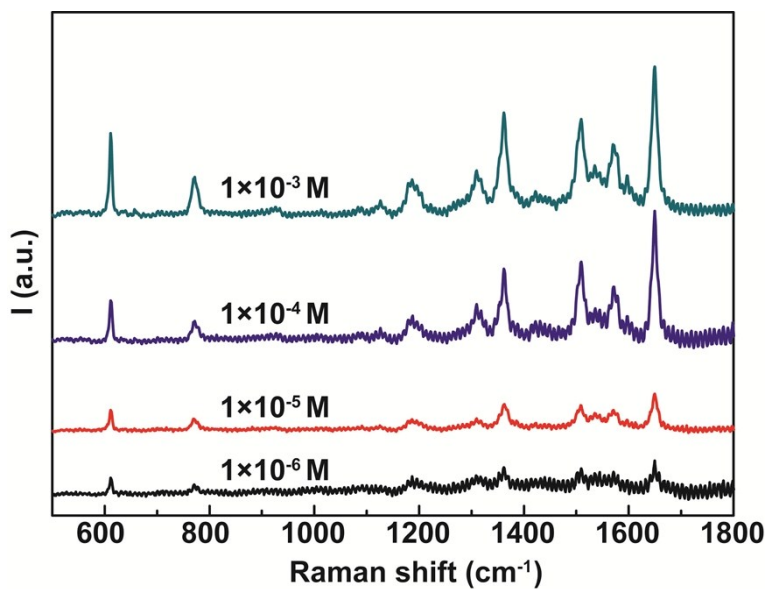

**Fig. S5** Raman spectra of R6G molecules with different concentrations on the products without ALD pretreatment.
